# Supplementary material
Source: PubMed Central journal article supplement (PMC7118695)
Supplement: NIHMS1559423-supplement-1.pdf [file NIHMS1559423-supplement-1.pdf]

Supplementary Table 1. Incidences of all uterine sarcoma by uterine weight among all women undergoing hysterectomy in Olmsted County, Minnesota, from 1/1/1999 to 12/31/2013 (n=4,232).

| Uterine Weight (grams)* | N (%) with unexpected sarcoma within each weight stratum |               |                |               |                   |            |
|-------------------------|----------------------------------------------------------|---------------|----------------|---------------|-------------------|------------|
|                         | LMS                                                      | Low-Grade ESS | High-Grade ESS | Adeno-sarcoma | Rhabdo-myosarcoma | Total      |
| <250 (N=3,349)          | 0                                                        | 2 (0.06%)     | 0              | 1 (0.03%)     | 0                 | 3 (0.09%)  |
| 250-499 (N=443)         | 0                                                        | 1 (0.23%)     | 0              | 1 (0.23%)     | 1 (0.23%)         | 3 (0.68%)  |
| 500-999 (N=209)         | 2 (0.96%)                                                | 0             | 1 (0.48%)      | 0             | 0                 | 3 (1.44%)  |
| 1000-1499 (N=63)        | 2 (3.17%)                                                | 0             | 2 (3.17%)      | 0             | 0                 | 4 (6.34%)  |
| 1500-1999 (N=9)         | 0                                                        | 1 (11.11%)    | 0              | 0             | 0                 | 1 (11.11%) |
| ≥ 2000 (N=14)           | 2 (14.29%)                                               | 0             | 0              | 0             | 0                 | 2 (14.29%) |

LMS: Leiomyosarcoma; ESS: Endometrial stromal sarcoma

\*Data available for n=4,087 [96.6% of the total number of benign hysterectomies (n=4,232)]
